# Supplementary material for: The Effect of RBP4 on microRNA Expression Profiles in Porcine Granulosa Cells
Source: MDPI journal article supplement (doi:10.3390/ani11051391), 2021-05-13
Supplement: s1 [file s1]

**Table S1** List of primers used for RT-qPCR, reverse transcription

| Primer name    | Sequence 5'-3'         |
|----------------|------------------------|
| RBP4-F         | GGGCGTAGCATCCTTCCT     |
| RBP4-R         | TCCGATTTGCCATCACAG     |
| KIT-F          | GAACAAATCCATGCCCACAC   |
| KIT-R          | CTCGACAACCTTCCACTGTAC  |
| SEMA6D-F       | CGAAGGTGGACTATGTTTCAGG |
| SEMA6D-R       | TCAGGTTTAAAGGACGGTGTC  |
| RAB3B-F        | AATCTTTTCTCCCAGCCCTG   |
| RAB3B-R        | CCCTACTTCCCCACTGATTTC  |
| GAPDH-F        | TGGGCATGAACCATGAGAAG   |
| GAPDH-R        | CCACGATGCCGAAGTTGTC    |
| miR-194a-5p-F  | CGCGTGTAACAGCAACTCCA   |
| miR-194a-5p-R  | GTGCAGGGTCCGAGGT       |
| miR-132-F      | GCGCGTAACAGTCTACAGCCA  |
| miR-132-R      | GTGCAGGGTCCGAGGT       |
| miR-98-F       | GCGCGTGAGGTAGTAAGTTGT  |
| miR-98-R       | GTGCAGGGTCCGAGGT       |
| miR-1343-F     | CTCCTGGGGCCCGCACCTCT   |
| miR-1343-R     | GTGCAGGGTCCGAGGT       |
| miR-145-5p-F   | CGGTCCAGTTTTCCCAGGA    |
| miR-145-5p-R   | GTGCAGGGTCCGAGGT       |
| miR-148a-5p-F  | GCGCGAAAGTTCTGAGACACT  |
| miR-148a-5p-R  | GTGCAGGGTCCGAGGT       |
| miR-32-F       | GCGCGGTATTGCACATTACTAA |
| miR-32-R       | GTGCAGGGTCCGAGGT       |
| miR-135-F      | GCGGTATGGCTTTTCATTCTT  |
| miR-135-R      | GTGCAGGGTCCGAGGT       |
| PC-5p-93122-F  | GCGCGGTAGTTGGTGGAG     |
| PC-5p-93122-R  | AGTGCAGGGTCCGAGGTATT   |
| PC-3p-102262-F | GCGCGCCTATTGGGAAAG     |
| PC-3p-102262-R | AGTGCAGGGTCCGAGGTATT   |
| miR-769-5p-F   | GCGGTGAGACCTCTGGGTTC   |
| miR-769-5p-R   | AGTGCAGGGTCCGAGGTATT   |
| miR-7142-3p-F  | GCGTTTGTGGCTCCTCTG     |
| miR-7142-3p-R  | AGTGCAGGGTCCGAGGTATT   |
| miR-7857-3p-F  | GCGATTGTTCTCCAACCTGG   |
| miR-7857-3p-R  | AGTGCAGGGTCCGAGGTATT   |
| miR-6782-3p-F  | CGTGACCTCTGGTCTCCCG    |

|                               |                                                        |
|-------------------------------|--------------------------------------------------------|
| miR-6782-3p-R                 | AGTGCAGGGTCCGAGGTATT                                   |
| miR-1277-F                    | CGCGCGCGTATATATATATATGTA                               |
| miR-1277-R                    | AGTGCAGGGTCCGAGGTATT                                   |
| PC-5p-17154-F                 | CGCGCGAAGTGTGTGTTC                                     |
| PC-5p-17154-R                 | AGTGCAGGGTCCGAGGTATT                                   |
| miR-193a-5p-F                 | TGGGTCTTTGCGGGCG                                       |
| miR-193a-5p-R                 | AGTGCAGGGTCCGAGGTATT                                   |
| U6-F                          | CTCGCTTCGGCAGCACA                                      |
| U6-R                          | AACGCTTCACGAATTTGCGT                                   |
| Reverse transcription primers |                                                        |
| miR-194a-5p                   | GTCGTATCCAGTGCAGGGTCCGAGGTATTCGCACTGGATACGACT<br>CCACA |
| miR-132                       | GTCGTATCCAGTGCAGGGTCCGAGGTATTCGCACTGGATACGACC<br>GACCA |
| miR-98                        | GTCGTATCCAGTGCAGGGTCCGAGGTATTCGCACTGGATACGACA<br>ACAAT |
| miR-1343                      | GTCGTATCCAGTGCAGGGTCCGAGGTATTCGCACTGGATACGACG<br>CGAGA |
| miR-145-5p                    | GTCGTATCCAGTGCAGGGTCCGAGGTATTCGCACTGGATACGACA<br>GGGAT |
| miR-148a-5p                   | GTCGTATCCAGTGCAGGGTCCGAGGTATTCGCACTGGATACGACA<br>GTCGG |
| miR-32                        | GTCGTATCCAGTGCAGGGTCCGAGGTATTCGCACTGGATACGACT<br>GCAAC |
| miR-135                       | GTCGTATCCAGTGCAGGGTCCGAGGTATTCGCACTGGATACGACT<br>CACAT |
| PC-5p-93122                   | GTCGTATCCAGTGCAGGGTCCGAGGTATTCGCACTGGATACGACG<br>AATCG |
| PC-3p-102262                  | GTCGTATCCAGTGCAGGGTCCGAGGTATTCGCACTGGATACGACG<br>GAAAC |
| miR-769-5p                    | GTCGTATCCAGTGCAGGGTCCGAGGTATTCGCACTGGATACGACA<br>GCTCA |
| miR-7142-3p                   | GTCGTATCCAGTGCAGGGTCCGAGGTATTCGCACTGGATACGACA<br>CACTT |
| miR-7857-3p                   | GTCGTATCCAGTGCAGGGTCCGAGGTATTCGCACTGGATACGACA<br>AAGAG |
| miR-6782-3p                   | GTCGTATCCAGTGCAGGGTCCGAGGTATTCGCACTGGATACGACA<br>CAGGG |
| miR-1277                      | GTCGTATCCAGTGCAGGGTCCGAGGTATTCGCACTGGATACGACC<br>ATACG |
| PC-5p-17154                   | GTCGTATCCAGTGCAGGGTCCGAGGTATTCGCACTGGATACGACG<br>CCACT |
| miR-193a-5p                   | GTCGTATCCAGTGCAGGGTCCGAGGTATTCGCACTGGATACGACT          |

|  |       |
|--|-------|
|  | CATCT |
|--|-------|
